# Supplementary material for: Thermally co-evaporated ternary chalcogenide AgBiS2 thin films for photovoltaic applications: new route for AgBiS2 synthesis and phase investigation
Source: Royal Society of Chemistry journal article supplement (doi:10.1039/d4ta01661k), 2024-01-01
Supplement: d4ta01661k1.pdf [file d4ta01661k1.pdf]

## Supporting Information

### **Thermally Co-Evaporated Ternary Chalcogenide AgBiS<sub>2</sub> Thin Films for Photovoltaic Applications: New Route for AgBiS<sub>2</sub> Synthesis and Phase Investigation**

*Minho Choi<sup>a,†</sup>, Suwhan Kim<sup>b,†</sup>, Minwoo Lee<sup>c</sup>, Jae Sung Yun<sup>d</sup>, Vijay C. Karade<sup>e</sup>, Jongchul Lim<sup>f</sup>, JungYup Yang<sup>g</sup> and Jongsung Park<sup>a,b,\*</sup>*

<sup>a</sup>Department of Energy Engineering, Gyeongsang National University, Jinju, Gyeongnam 52828, Republic of Korea.

<sup>b</sup>Future Convergence Technology Research Institute, Gyeongsang National University, Jinju, Gyeongnam 52828, Republic of Korea.

<sup>c</sup>School of Materials Science and Engineering, University of New South Wales (UNSW), Sydney, NSW, 2052, Australia.

<sup>d</sup>Department of Electrical and Electronic Engineering, Advanced Technology Institute (ATI), University of Surrey, Guildford, Surrey GU2 7XH, United Kingdom

<sup>e</sup>Department of Physics and Astronomy, Wright Center for Photovoltaic Innovation and Commercialization, University of Toledo, Toledo, Ohio 43606, United States

<sup>f</sup>Graduate School of Energy Science and Technology(GEST), Chungnam National University, Daejeon 34134, Republic of Korea

<sup>g</sup>Department of Physics, Kunsan National University, Gunsan 54150, Republic of Korea.

**\*Corresponding Author:** [j.park@gnu.ac.kr](mailto:j.park@gnu.ac.kr) (Prof. J. Park)

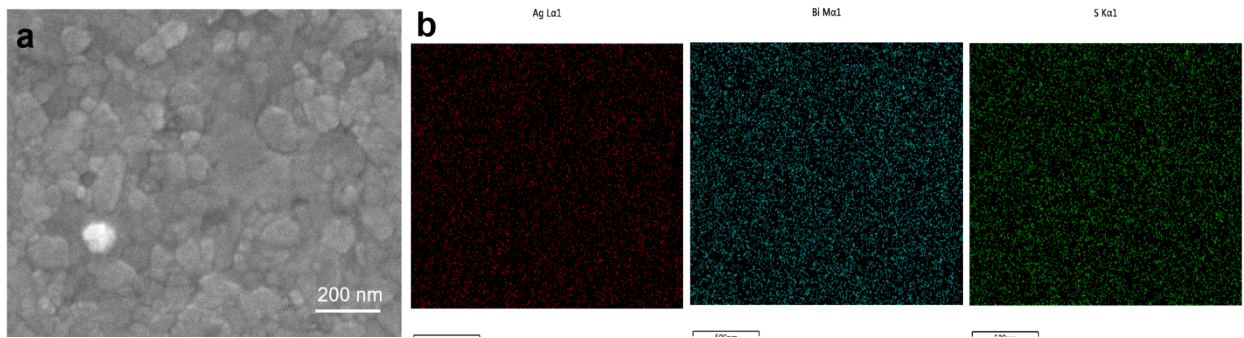

**Fig. S1** (a) SEM image of AgBiS<sub>2</sub> surface morphology and (b) EDS mapping of absorber for Ag, Bi and S elements.

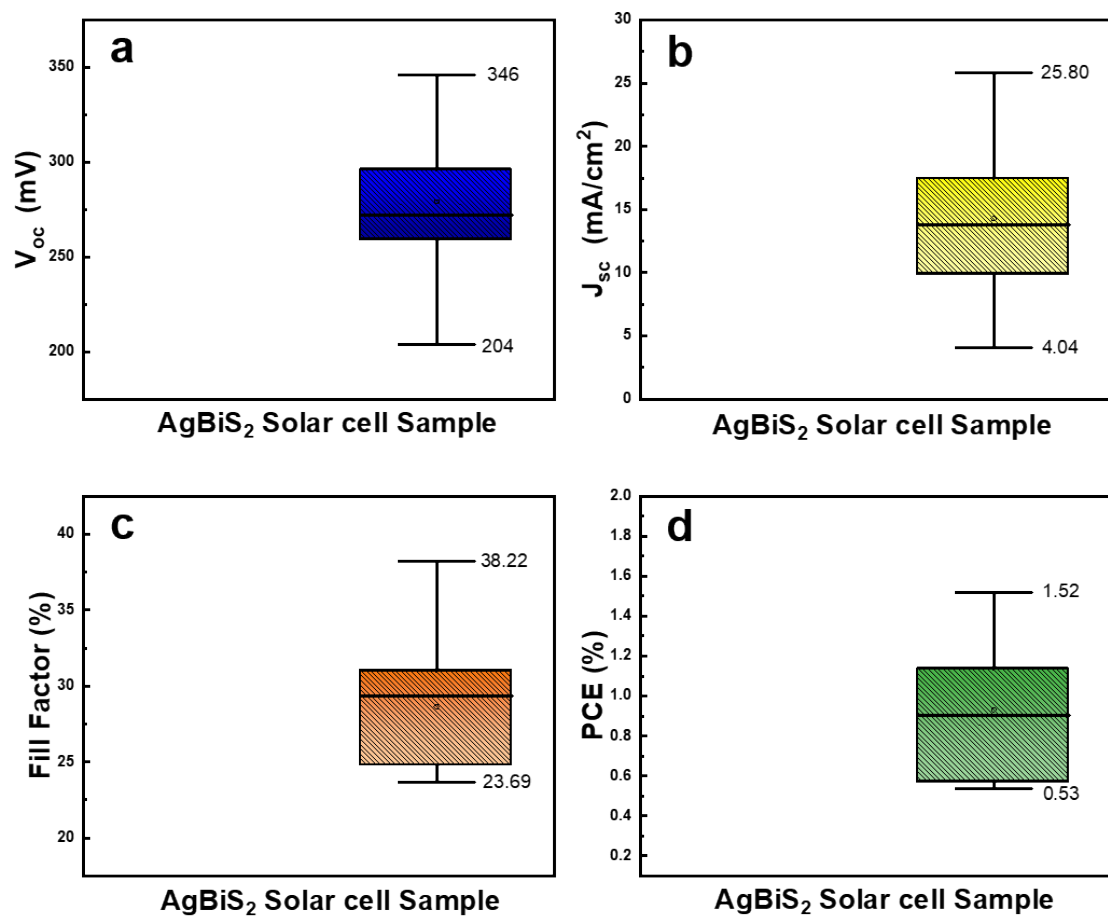

**Fig. S2** statistical box plot for the (a)  $V_{oc}$ , (b)  $J_{sc}$ , (c) fill factor and (d) PCE from 50 devices.

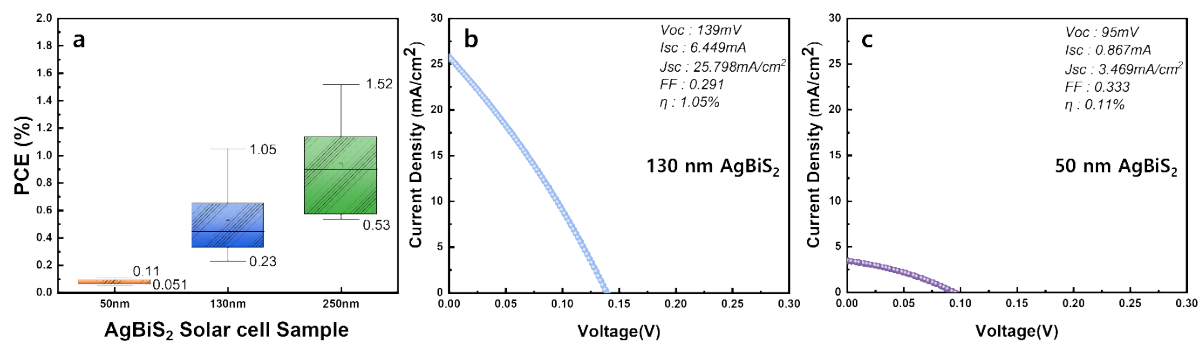

**Fig. S3** (a) PCE as a function of AgBiS<sub>2</sub> absorber thickness, and J-V curve of the champion device with (b) 130nm and (c) 50nm absorber thickness
